# Supplementary material
Source: HighWire-hosted journal article supplement (https://gut.bmj.com/content/71/12/2401)
Supplement: inline-supplementary-material-4 [file inline-supplementary-material-4.pdf]

| Samples<br>CODE | Carbapenem Gene |                |                |                | AmpC genes      |                 |                |                | ESBL genes     |                |                |                |
|-----------------|-----------------|----------------|----------------|----------------|-----------------|-----------------|----------------|----------------|----------------|----------------|----------------|----------------|
|                 | NDM<br>(660bp)  | KPC<br>(863bp) | OXA<br>(464bp) | VIM<br>(865bp) | MOX1<br>(520bp) | LAT1<br>(452bp) | DHA<br>(405bp) | ACC<br>(346bp) | TEM<br>(546bp) | CTX<br>(675bp) | OXA<br>(451bp) | SHV<br>(543bp) |
| FD-1            | -               | -              | -              | -              | -               | -               | -              | -              | -              | -              | -              | -              |
| FD-2            | -               | -              | -              | -              | -               | -               | -              | -              | -              | -              | -              | -              |
| FD-3            | -               | -              | -              | -              | -               | -               | -              | -              | -              | -              | -              | -              |
| FD-4            | -               | -              | -              | -              | -               | -               | -              | -              | -              | -              | -              | -              |
| FD-5            | -               | -              | -              | -              | -               | -               | -              | -              | -              | -              | -              | -              |
| FD-6            | -               | -              | -              | -              | -               | -               | -              | -              | -              | -              | -              | -              |
| FD-7            | -               | -              | -              | -              | -               | -               | -              | -              | -              | -              | -              | -              |
| FD-8            | -               | -              | -              | -              | -               | -               | -              | -              | -              | -              | -              | -              |
| FD-9            | -               | -              | -              | -              | -               | -               | -              | -              | -              | -              | -              | -              |
| FD-10           | -               | -              | -              | -              | -               | -               | -              | -              | -              | -              | -              | -              |
| FD-11           | -               | -              | -              | -              | -               | -               | -              | -              | -              | -              | -              | -              |
| FD-12           | -               | -              | -              | -              | -               | -               | -              | -              | -              | -              | -              | -              |
| FD-13           | -               | -              | -              | -              | -               | -               | -              | -              | -              | -              | -              | -              |
