# Supplementary material
Source: HighWire-hosted journal article supplement (https://gut.bmj.com/content/71/12/2401)
Supplement: inline-supplementary-material-6 [file inline-supplementary-material-6.pdf]

Species

- [Eubacterium] eligens ATCC 27750
- [Ruminococcus] faecis JCM 15917
- aerofaciens
- anaerobia JC110
- bififormis
- butyriciproducens
- callidus
- catus
- confusa
- copri DSM 18205
- coprostanoligenes
- faecis
- formicilis
- hadrus
- hallii
- indica
- isoflavoniconvertens
- longicatena
- mitsuokai
- parainfluenzae ATCC 33392
- prausnitzii
- rectale ATCC 33656
- rogosae
- ruminis
- saccharivorans
- salivarius
- sanguinis
- timonensis
- NA

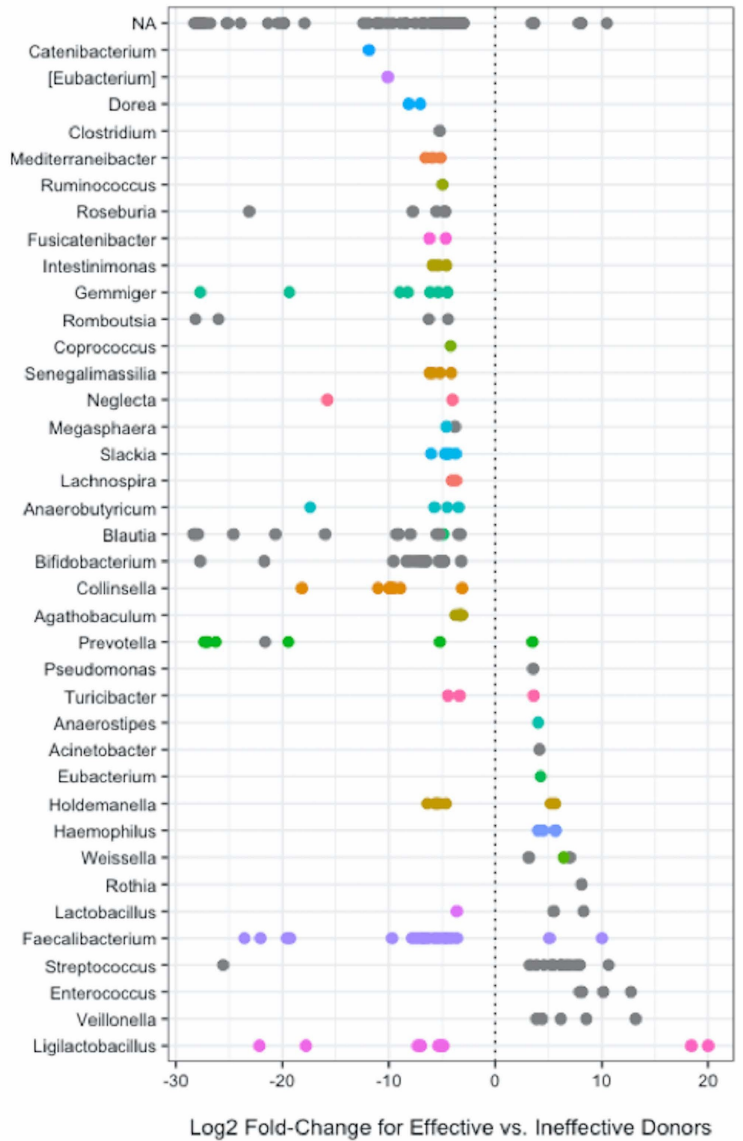

Supplementary figure 4
